# Supplementary material
Source: MDPI journal article supplement (https://www.mdpi.com/2673-9976/18/1/8)
Supplement: s1 [file s1]

**Foods  
2022**

**The 3rd International Electronic Conference  
on Foods: Food, Microbiome, and Health**  
01-15 OCTOBER 2022 | ONLINE

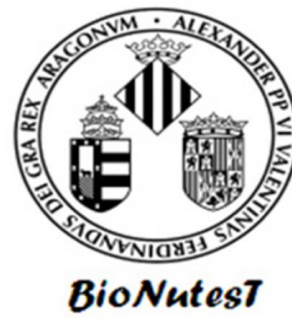

# **Adaptation of the INFOGEST digestion for the elderly population to assess sterol bioaccessibility in a plant sterol-enriched wholemeal rye bread**

**Diego Miedes**

Mussa Makran, Guadalupe Garcia-Llatas, Reyes Barberá, Antonio Cilla & Amparo Alegría

**Nutrition and Food Science Area, Faculty of Pharmacy, University of Valencia, Spain**

**This study is part of the project PID2019-104167RB-I00 funded by MCIN/AEI/10.13039/501100011033**

# INDEX

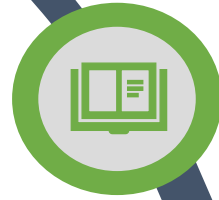

INTRODUCTION

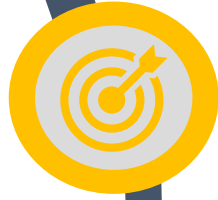

OBJECTIVES

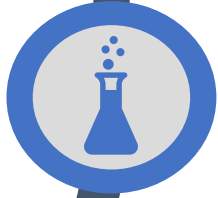

MATERIALS AND METHODS

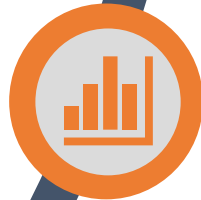

RESULTS AND DISCUSSION

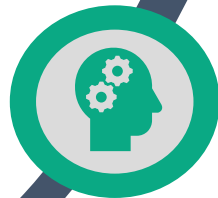

CONCLUSIONS

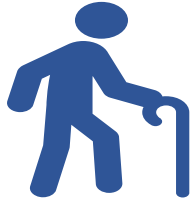

## Elderly population

≥ 65 years old

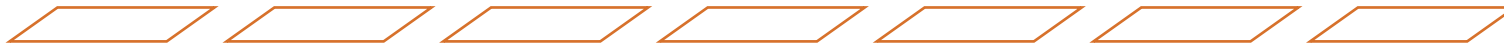

Physiological decline<sup>2</sup>

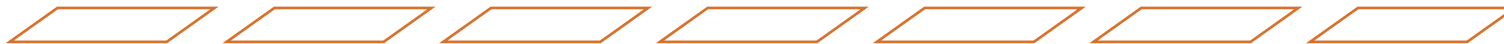

Increase in chronic disease risk factors: hypercholesterolemia<sup>1</sup>

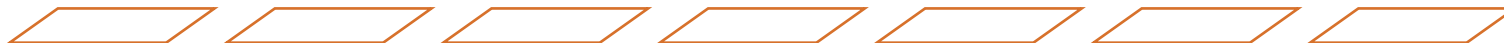

# PLANT STEROL (PS)-ENRICHED FOODS

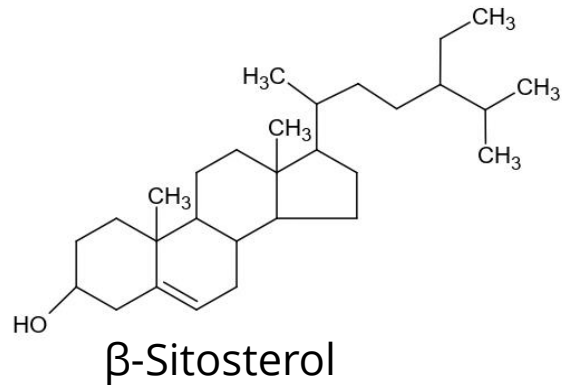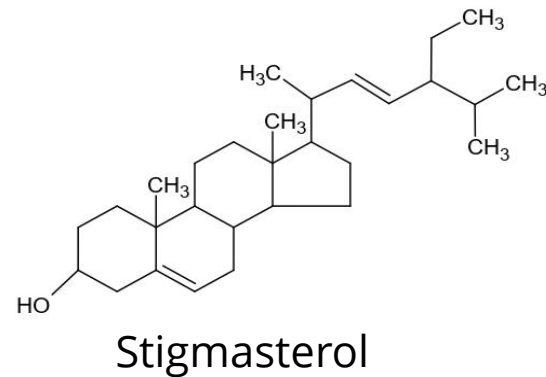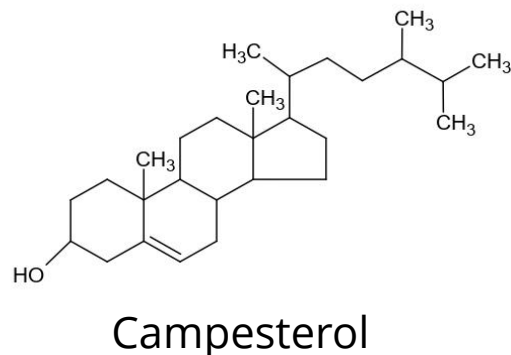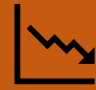

Serum cholesterol-lowering effect<sup>1</sup>

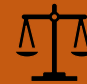

Dose 1.5 – 3 g PS/day<sup>2</sup>

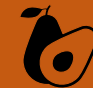

Diet < 600 mg PS/day

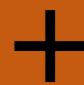

Food fortification

# PLANT STEROL-ENRICHED FOODS

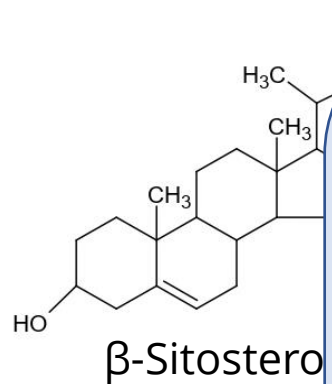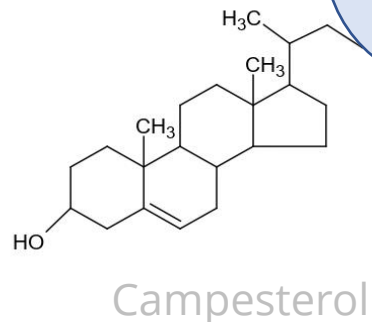

## Wholemeal rye bread

## Bioaccessibility

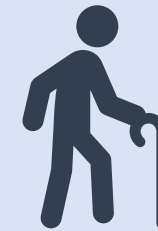

Decision 2006/58/CE. OJ 03/02/2006. L31/18 Decision 2006/59/CE. OJ 03/02/2006. L31/21

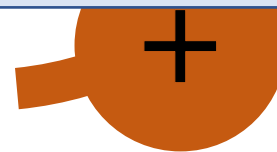

## Food fortification

lowering effect

g/day

g/day

## OBJECTIVES

To adapt the standardized INFOGEST 2.0 method for the adult to the elderly physiological conditions.

To assess the plant sterol bioaccessibility of an enriched wholemeal rye bread under elderly conditions

## Sample

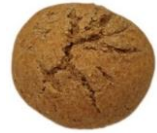

PS-enriched wholemeal rye bred (2.3%, w/w)

Wholemeal  
rye flour

PS-ingredient

Salt

Water

Ascorbic acid

Yeast

## Manufacturing

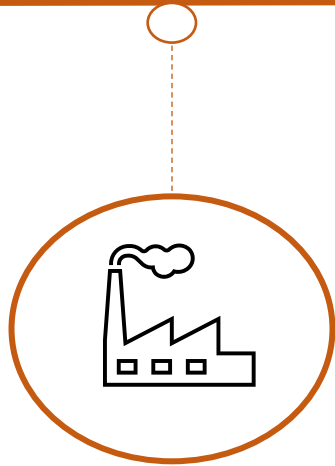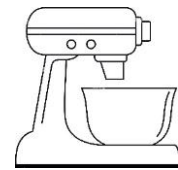

10 min

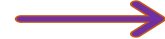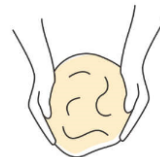

15 min

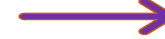

Fermentation

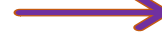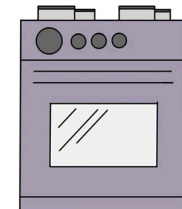

Kneased (11 min)

Divided and rolled

28°C/45 min/85% RH

180°C/25 min

After baking → Partial dehydration (until humidity < 14%, w/w)

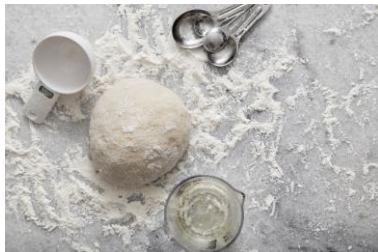

## Simulated gastrointestinal digestion: oral phase

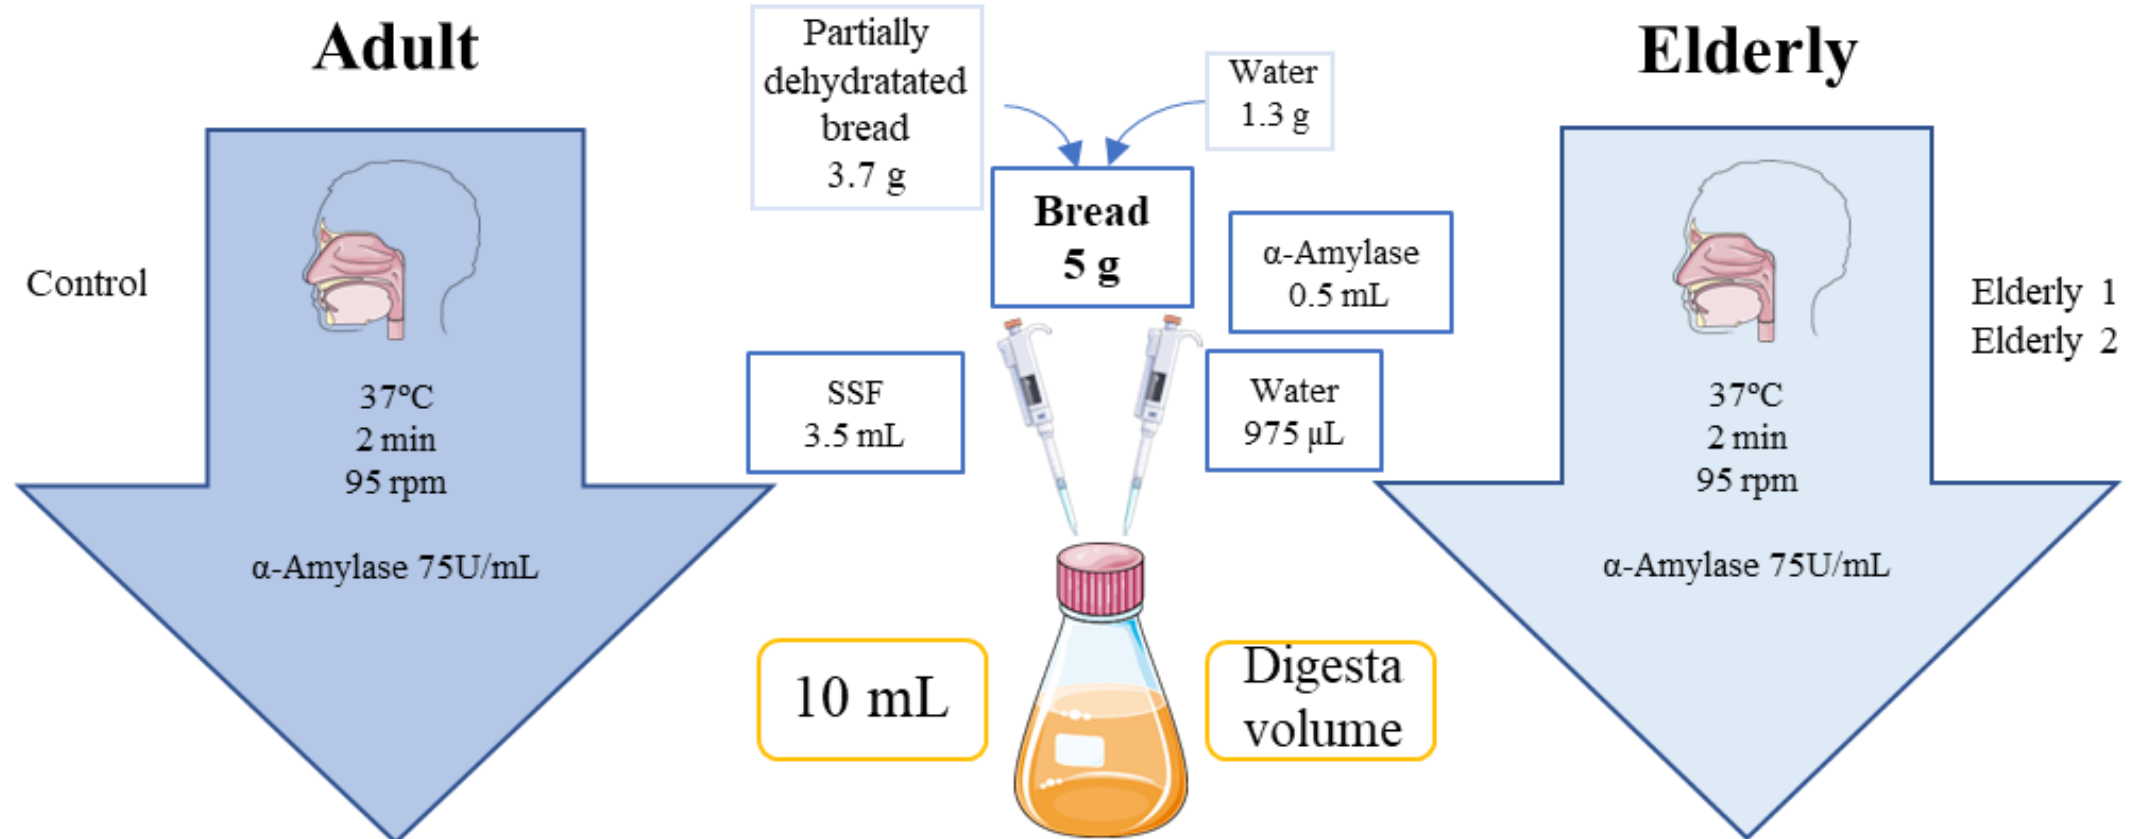

## Simulated gastrointestinal digestion

### Gastric phase

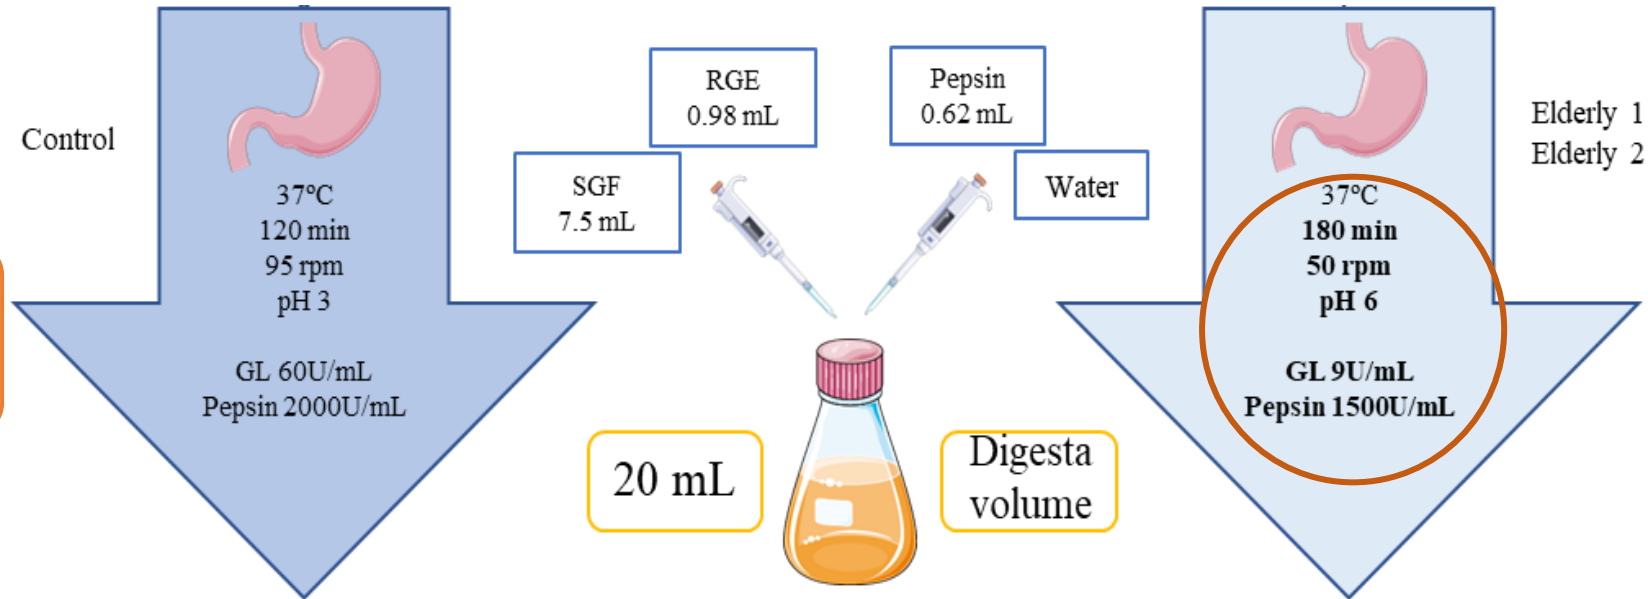

### Intestinal phase

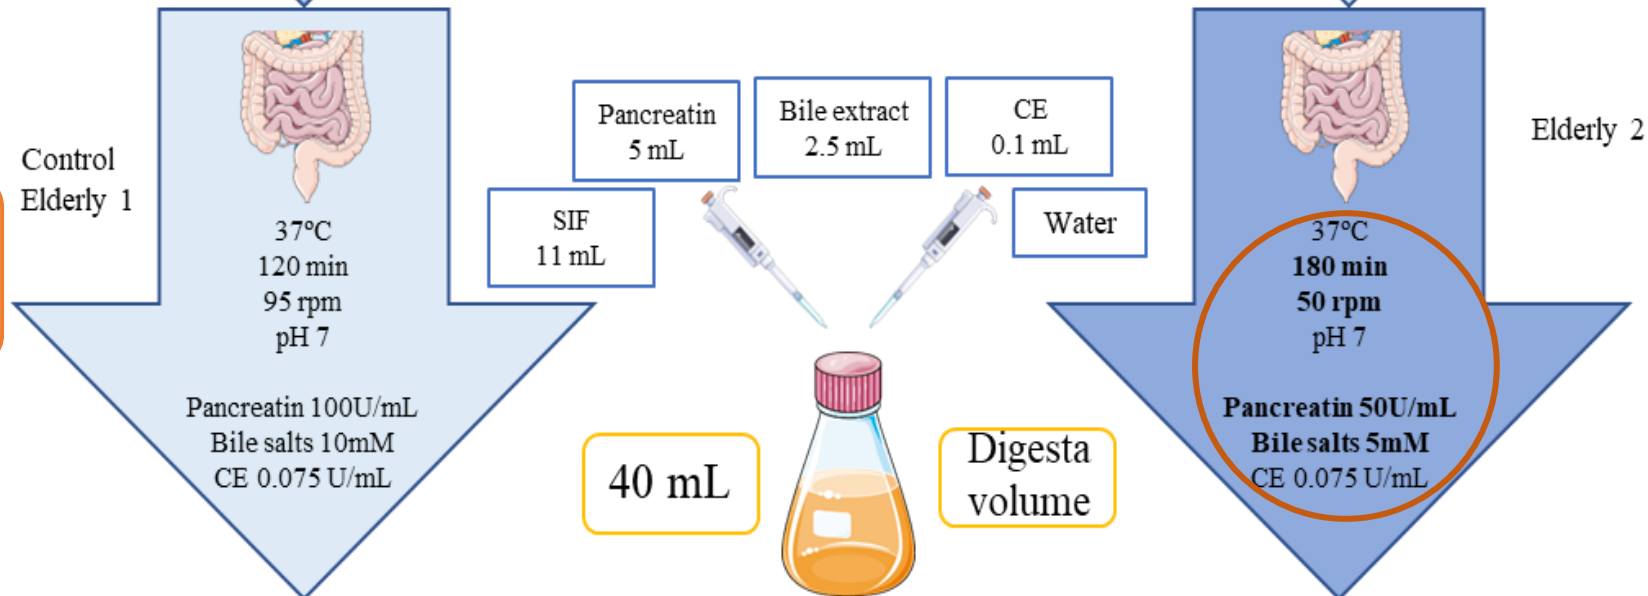

Bioaccessible fraction

Centrifugation

# Sterol content determination

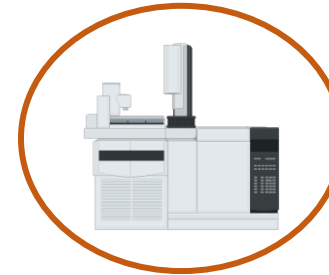

## PARTIALLY DRIED RYE BREAD (0.35 g)

Internal standard (IS): Epicoprostanol, 1 mg

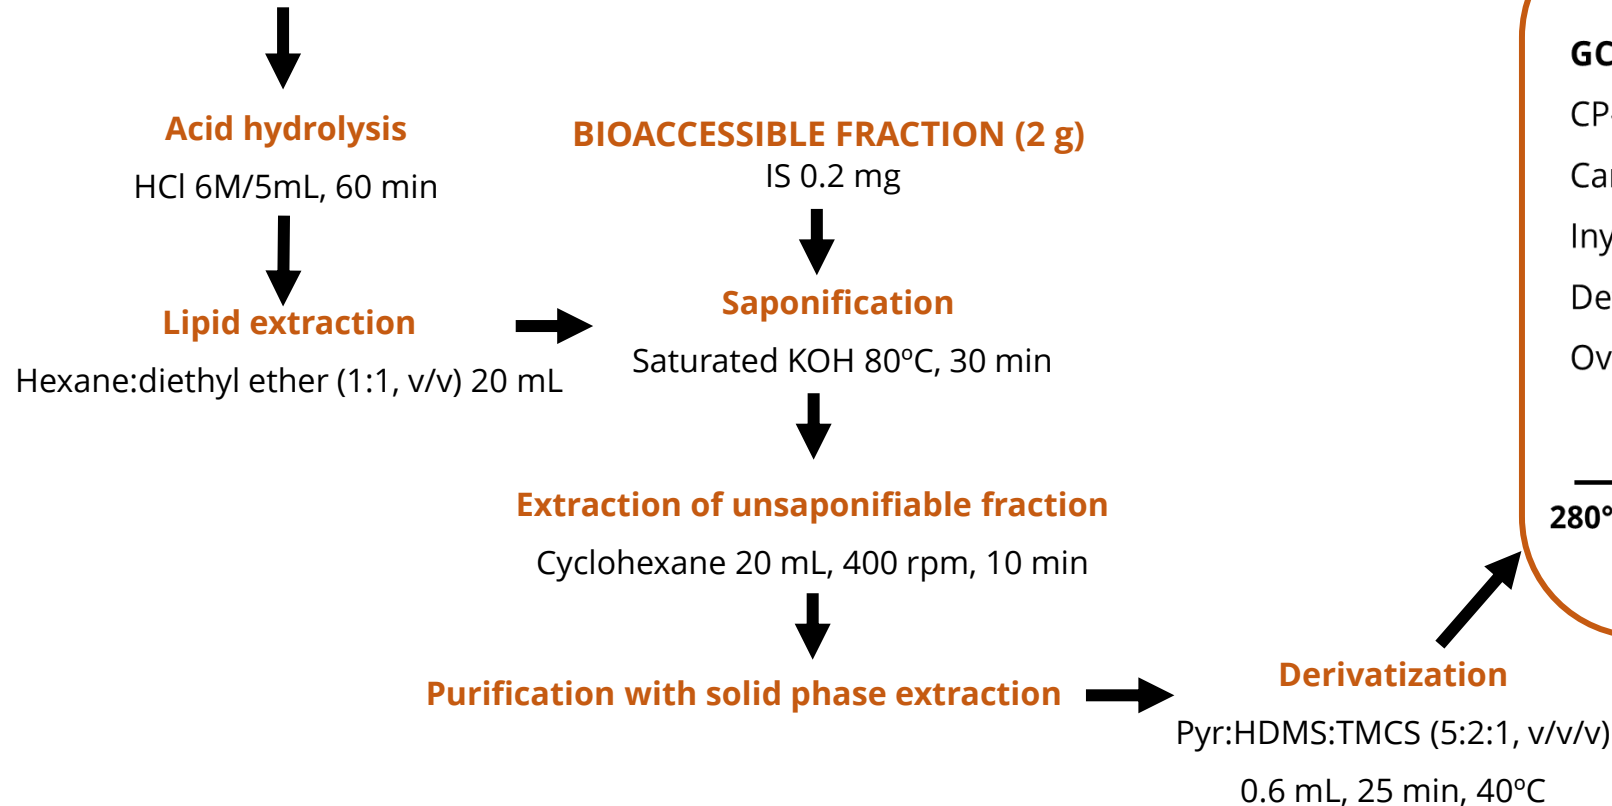

## Chromatographic conditions

### GC-FID YL Instrument 6500 System

CP-sil 8 low bleed/MS, 50 m x 0,25 mm x 0,25 µm

Carrier gas: H<sub>2</sub> (2 mL/min)

Inyector: 325°C (split 1:20)

Detector: 325°C

Oven:

280°C, 20 min  
0.7°C/min  
290°C, 5 min  
30°C/min  
320°C, 5 min

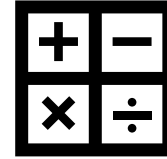

## Plant sterol bioaccessibility in wholemeal rye bread

$$\text{Bioaccessibility (\%)} = \frac{\text{Sterol content in bioaccessible fraction}}{\text{Sterol content in rye bread}} \times 100$$

## Wholemeal rye bread

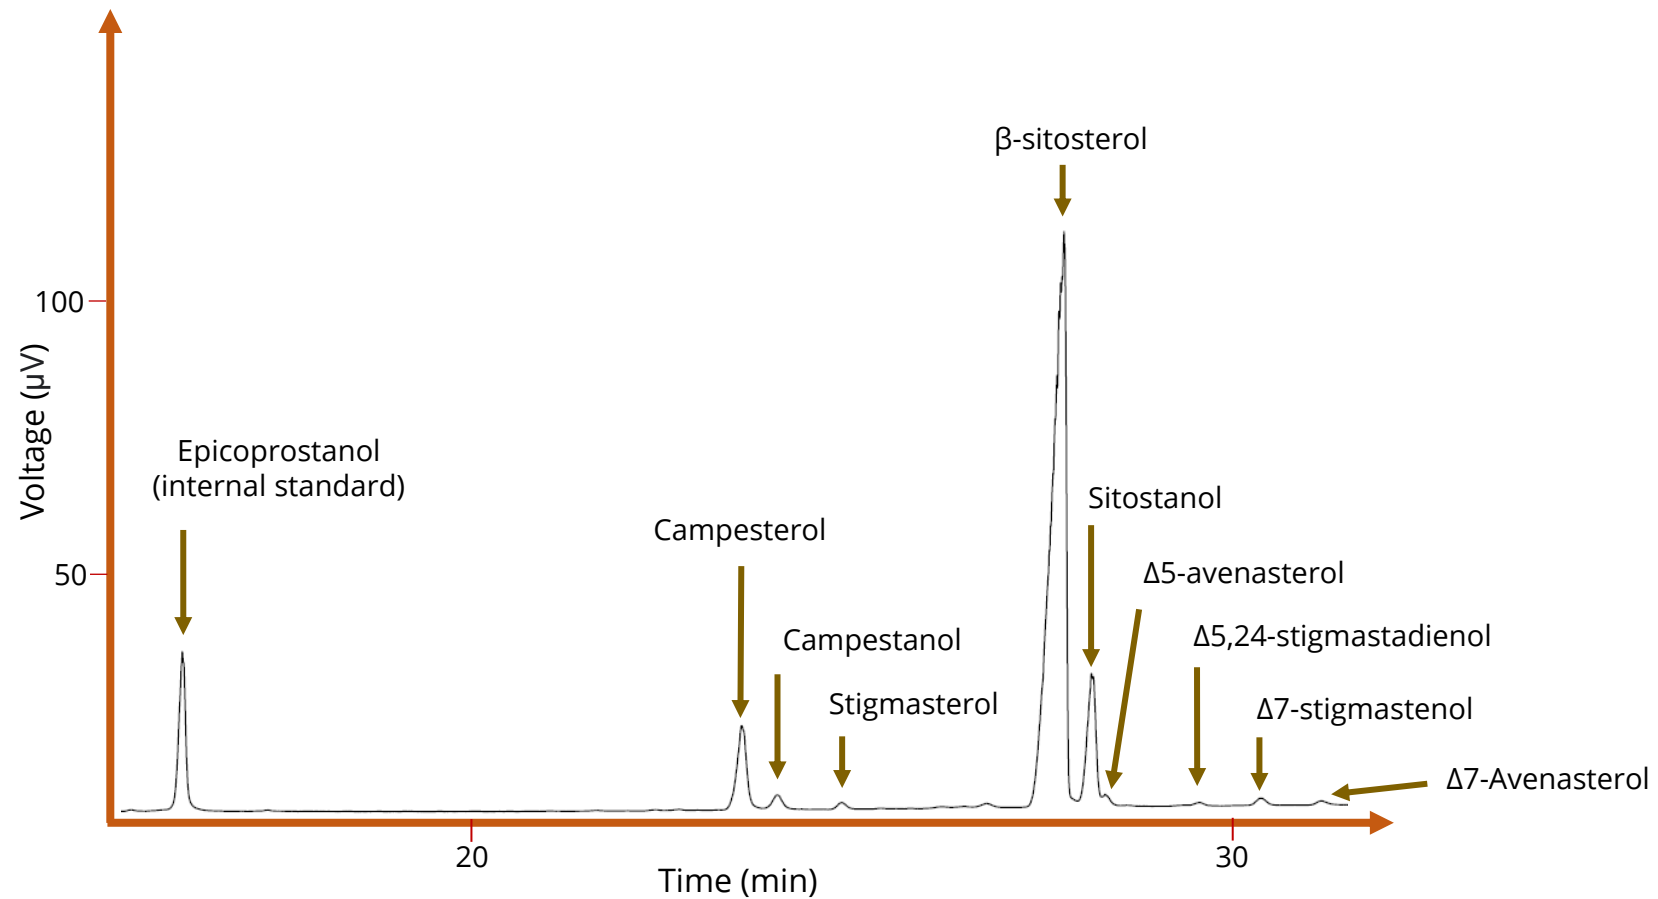

### PS profile according to European regulations

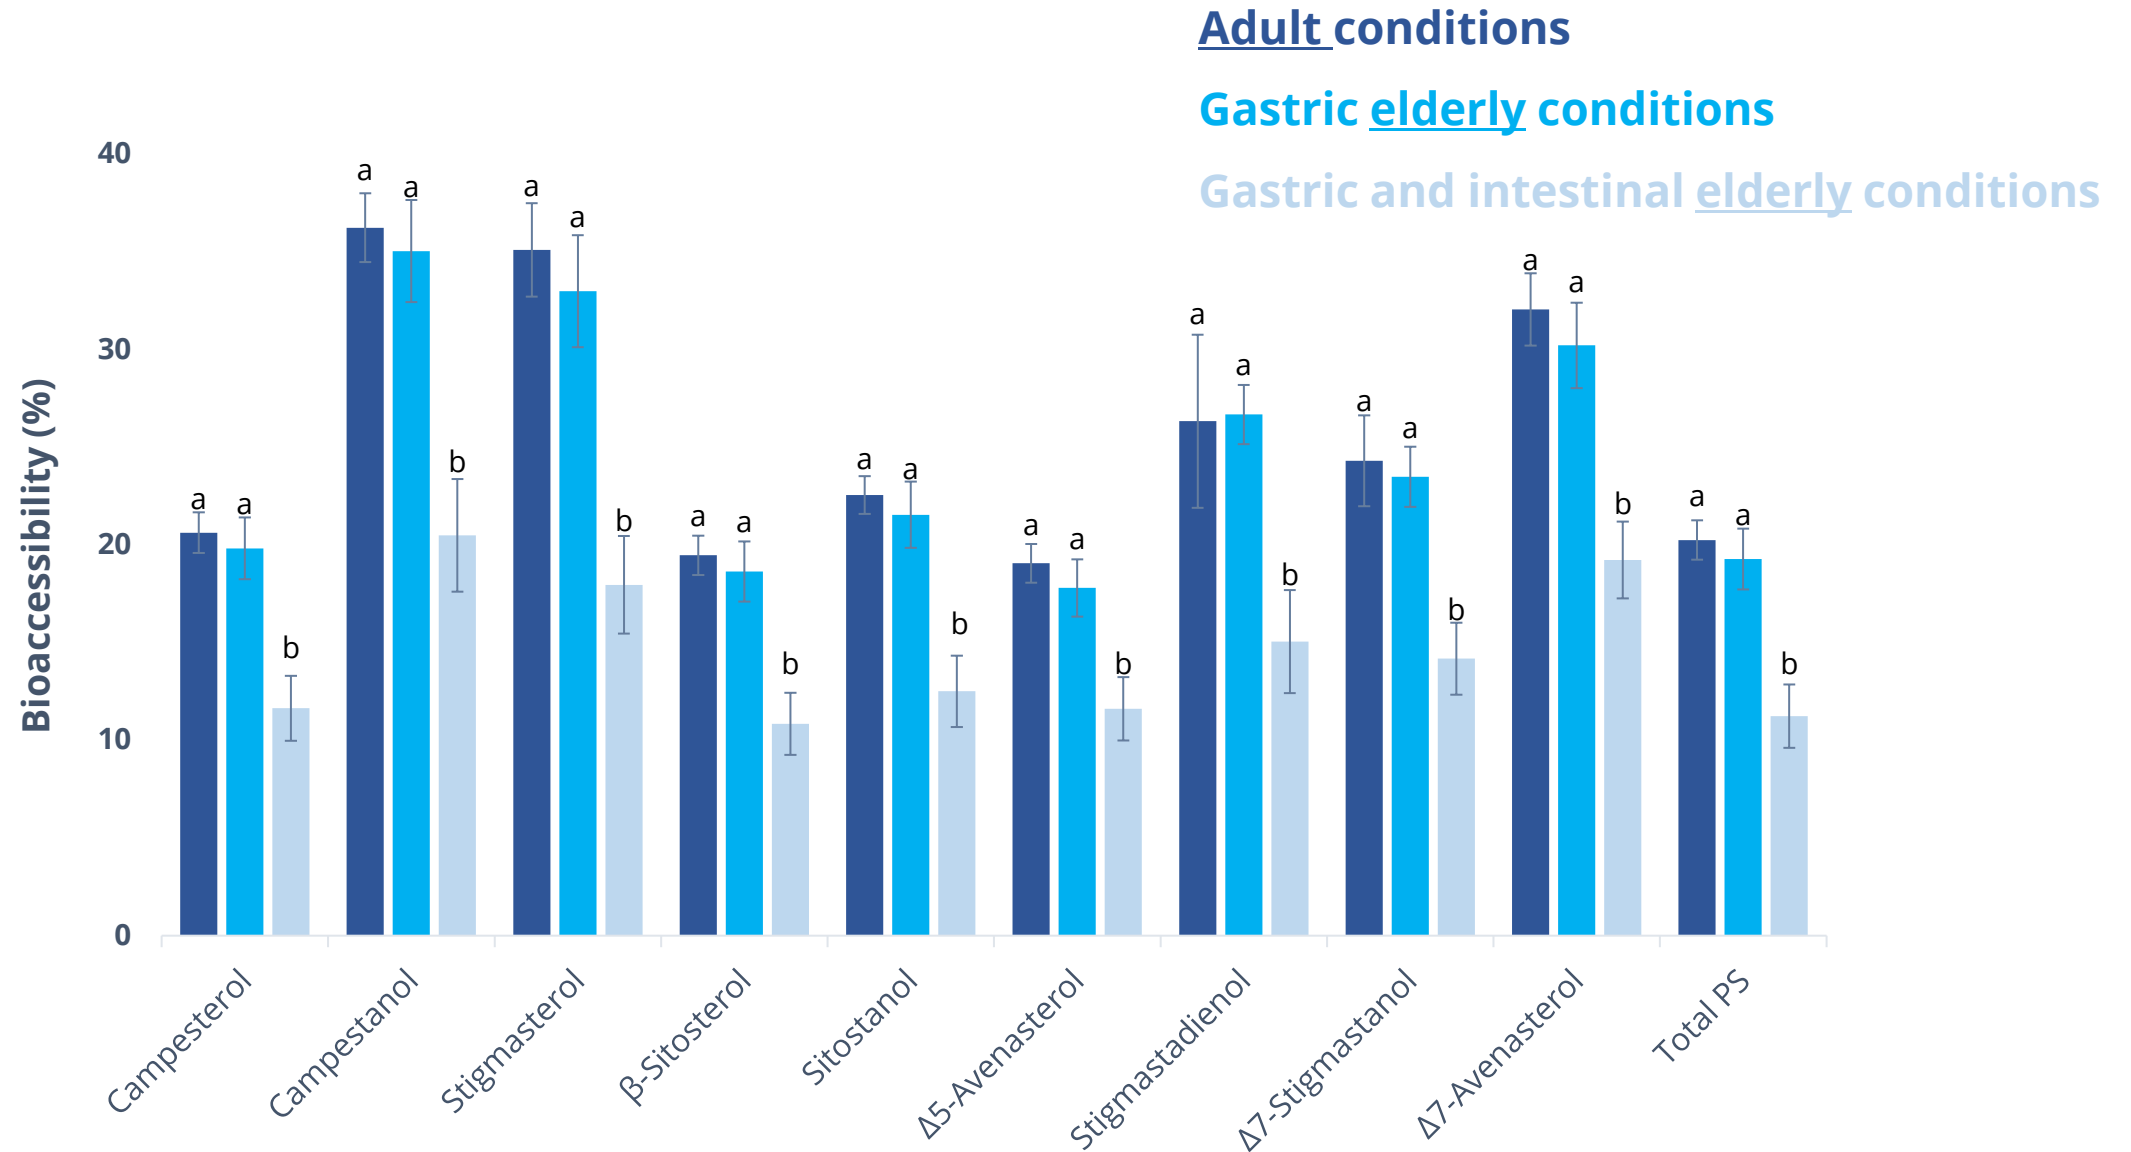

Different lowercase letters (a-b) indicate statistically significant differences ( $p < 0.05$ ) in the bioaccessibility of each sterol between digestion conditions

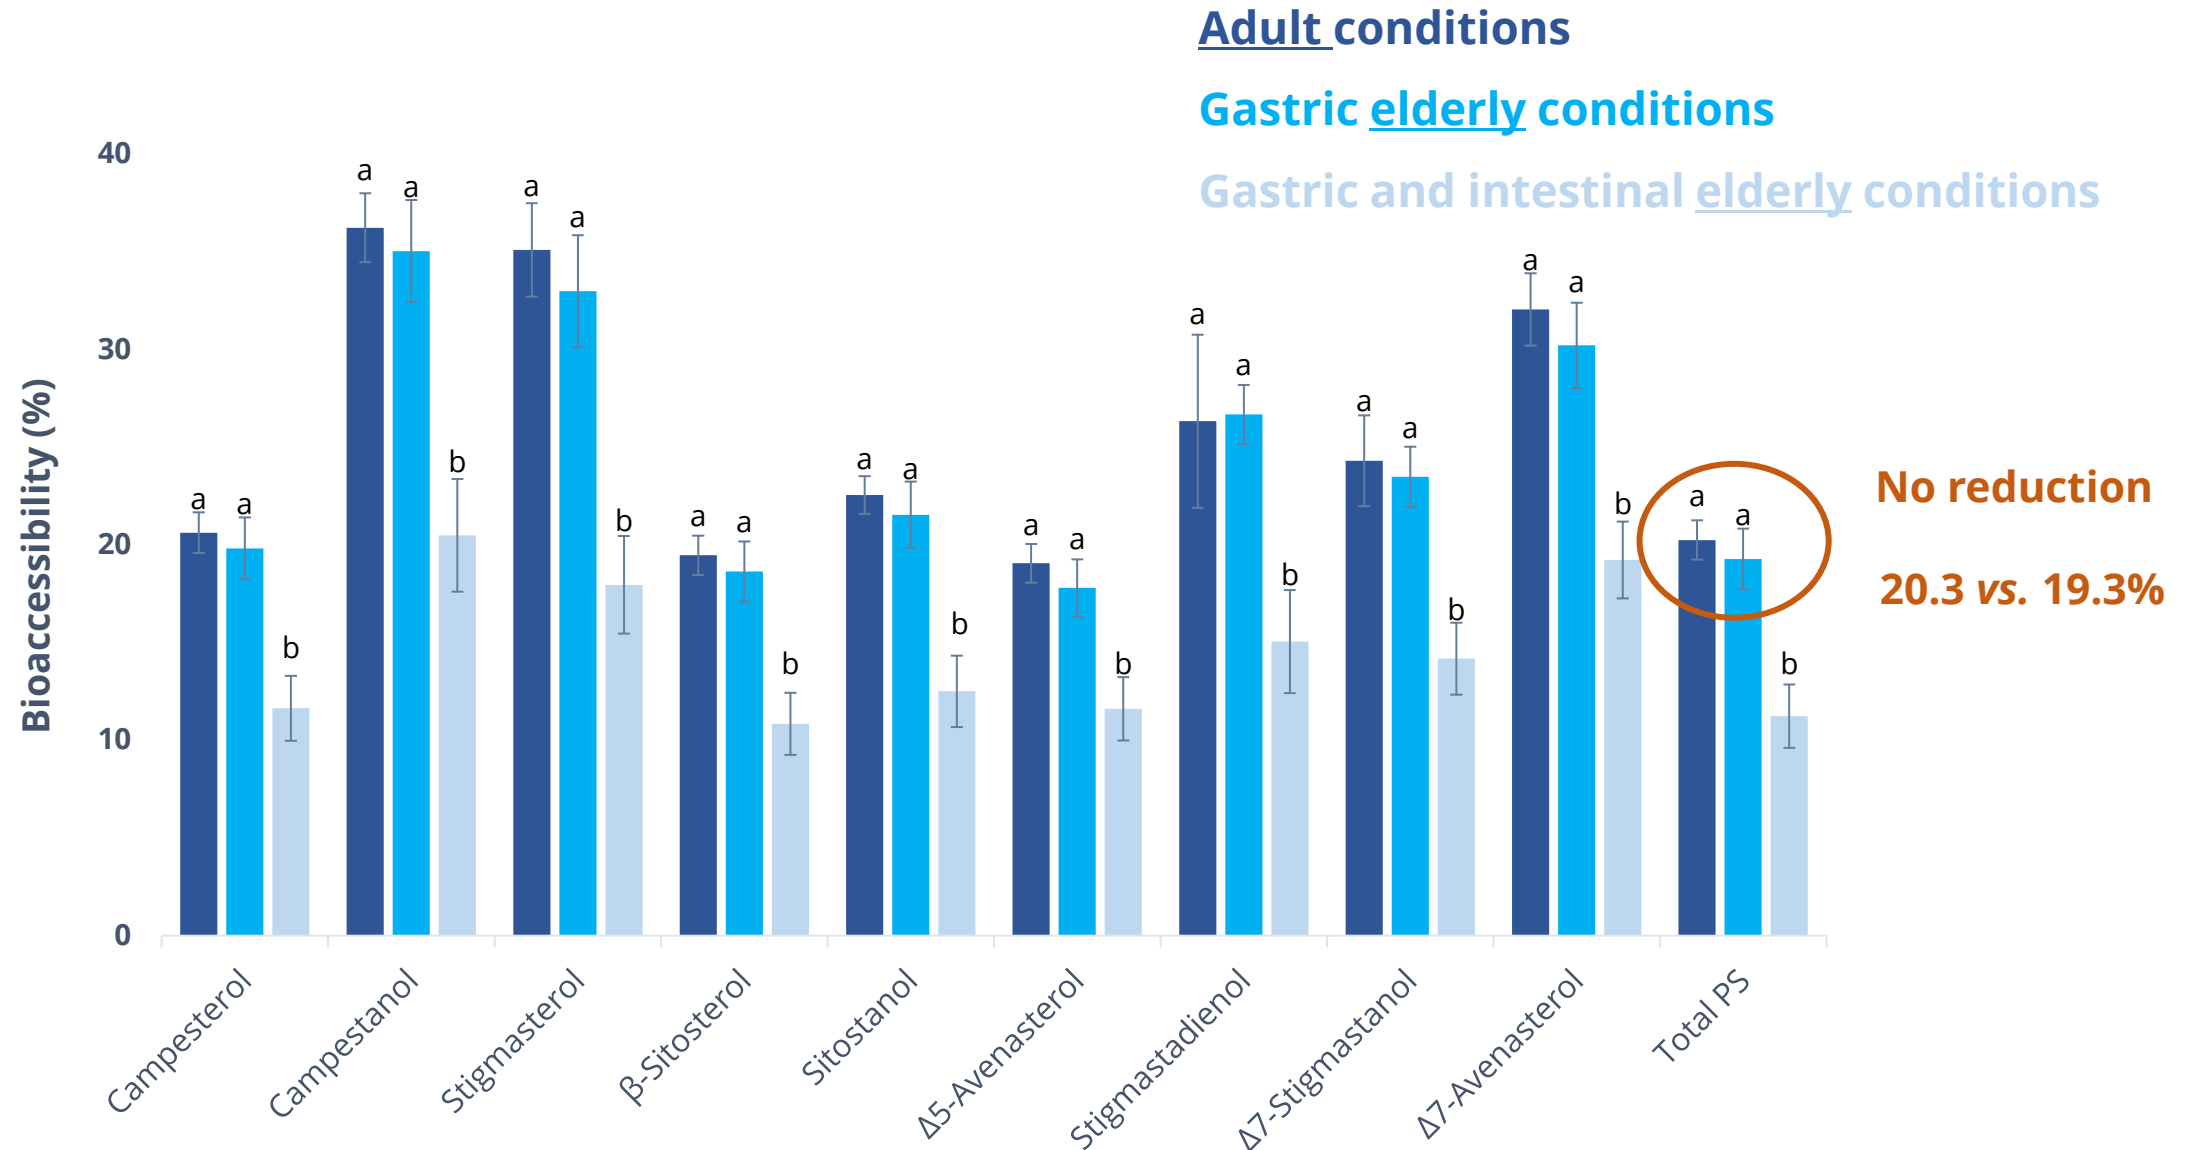

Different lowercase letters (a-b) indicate statistically significant differences ( $p < 0.05$ ) in the bioaccessibility of each sterol between digestion conditions

Adult conditionsGastric elderly conditionsGastric and intestinal elderly conditions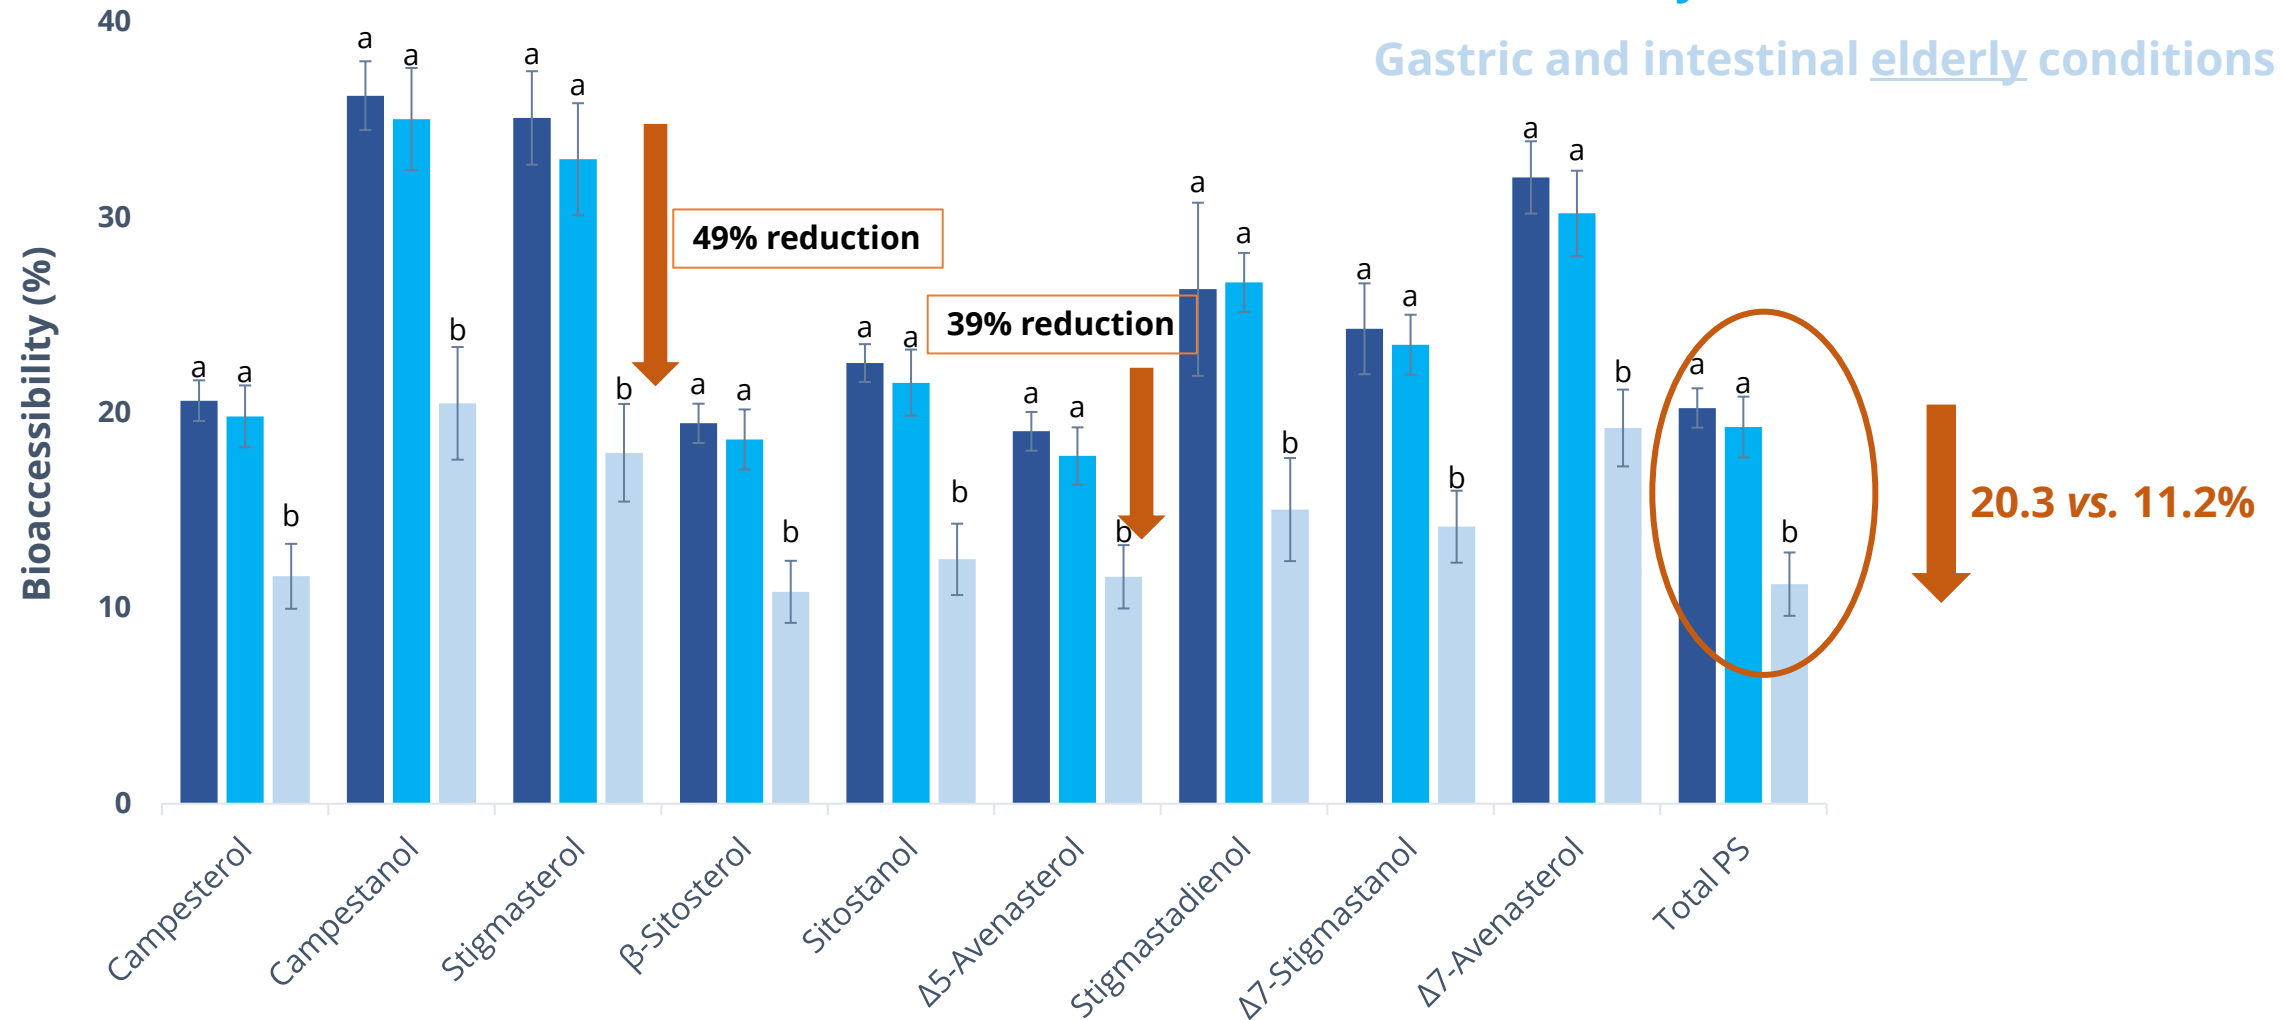

Different lowercase letters (a-b) indicate statistically significant differences ( $p < 0.05$ ) in the bioaccessibility of each sterol between digestion conditions

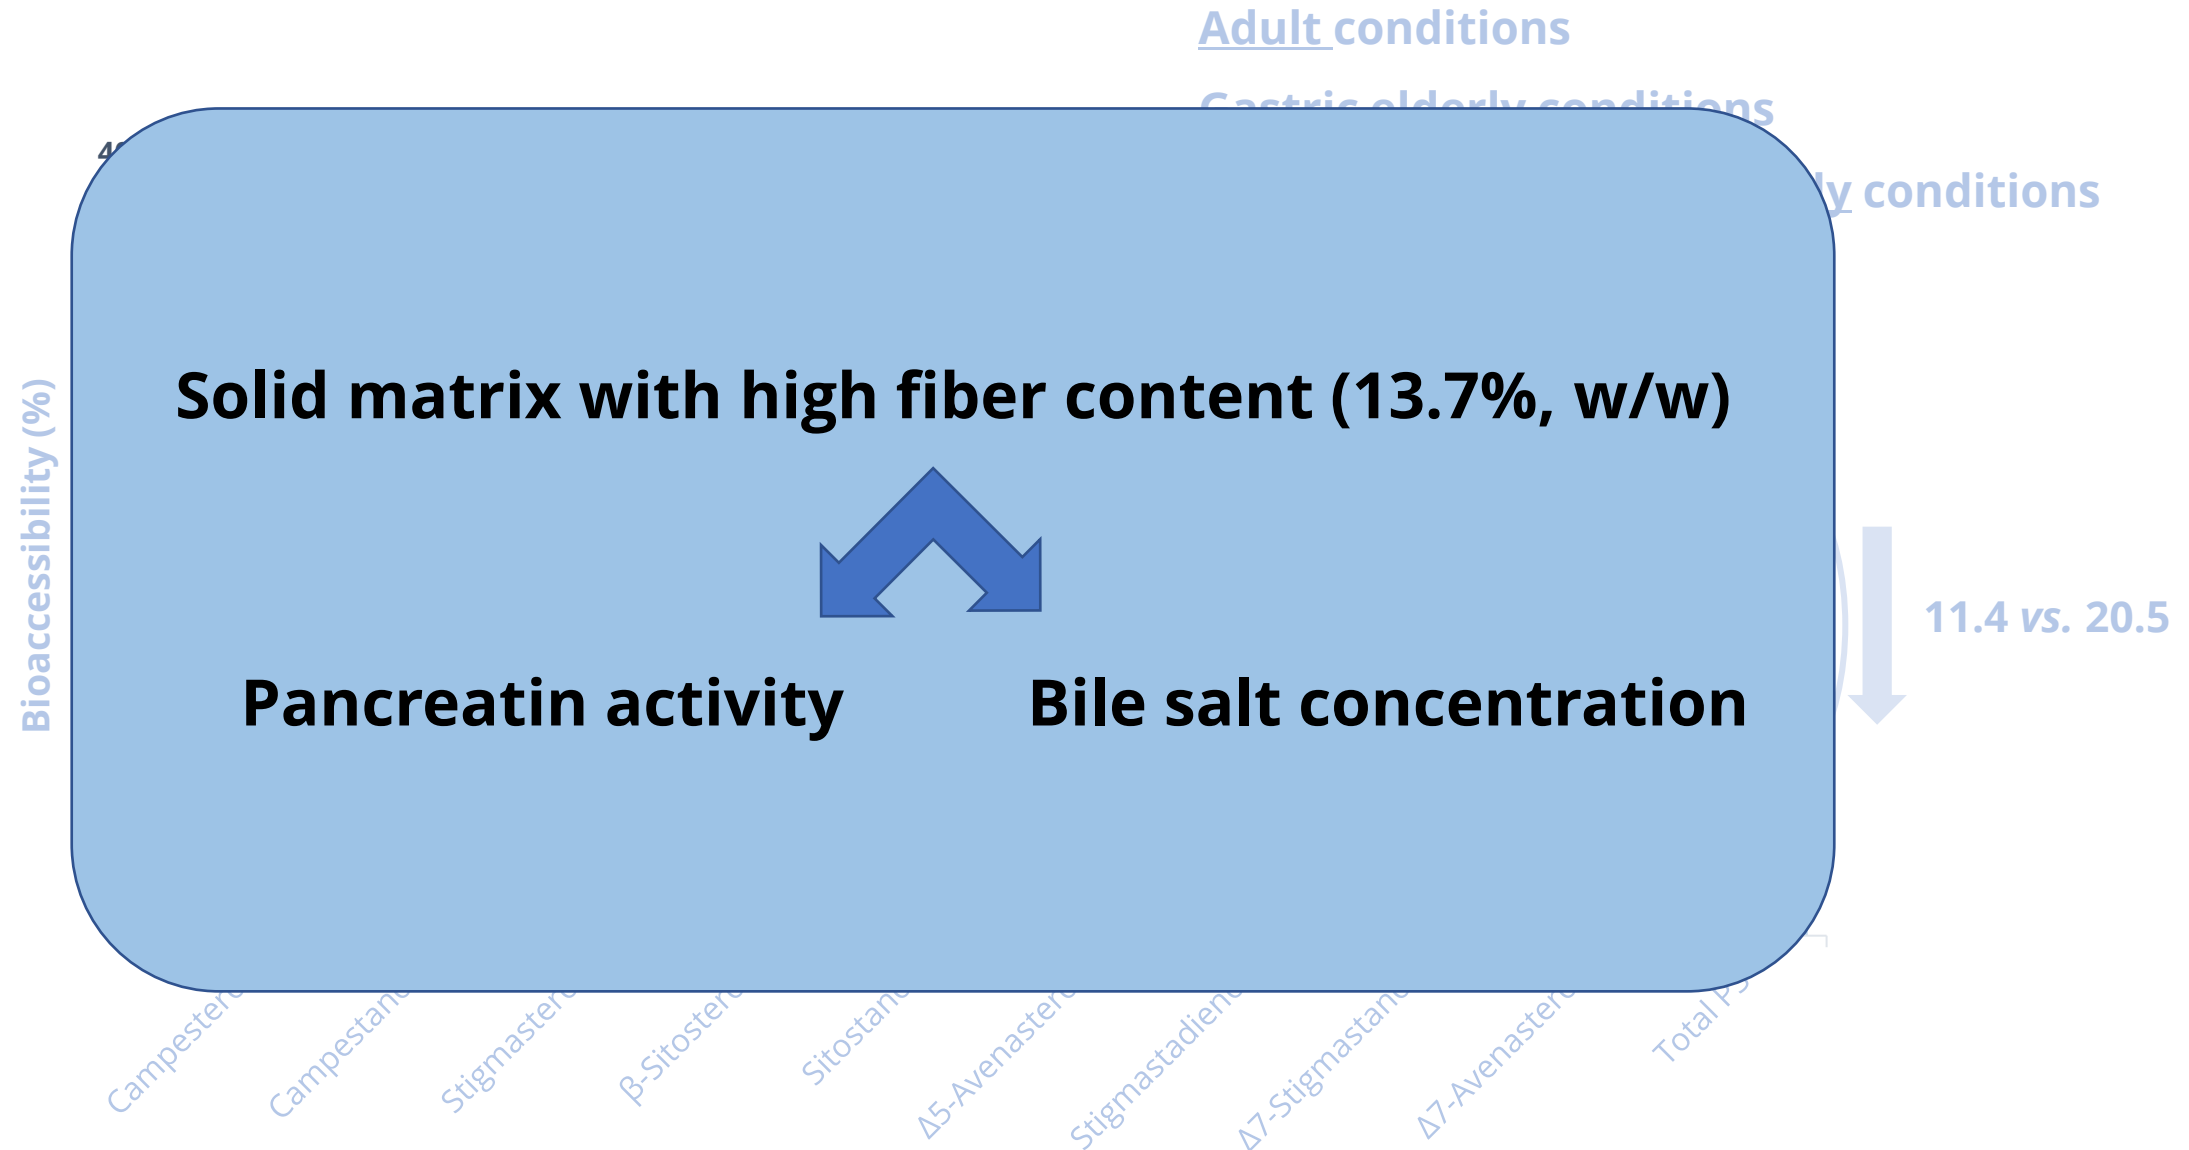

- ❑ The elderly gastrointestinal adapted conditions decrease (vs. adult) the bioaccessibility of plant sterols in an enriched wholemeal rye bread, probably due to the solid nature of the matrix and its fiber content
- ❑ Nevertheless, the enriched wholemeal rye bread can be an adequate food for the elderly population. Its good nutritional profile is the main factor for this recommendation.

**Foods  
2022**

**The 3rd International Electronic Conference  
on Foods: Food, Microbiome, and Health**  
01-15 OCTOBER 2022 | ONLINE



# **Adaptation of the INFOGEST digestion for the elderly population to assess sterol bioaccessibility in a plant sterol-enriched wholemeal rye bread**

**Diego Miedes**

Thanks for your attention

[diemie@alumni.uv.es](mailto:diemie@alumni.uv.es)
